# Supplementary material for: Molecular dynamics simulation and QM/MM calculation reveal the selectivity mechanism of type I 1/2 kinase inhibitors: the effect of intramolecular H-bonds and conformational restriction for improved selectivity
Source: Royal Society of Chemistry journal article supplement (doi:10.1039/c9cp04353e), 2019-01-01
Supplement: c9cp04353e1.pdf [file c9cp04353e1.pdf]

|                     |             |          |                                                                         |     |
|---------------------|-------------|----------|-------------------------------------------------------------------------|-----|
| Q9WUL6              | M3K14_MOUSE | 1        | MAMVEVACPPTGSAVGGQKELAKAKEKTQSLGKKQSCIFKLEAVEKSPVFCGKWEILND             | 60  |
| O96013              | PAK4_HUMAN  | 1        | -----MFGKRKRVEISAP-SNFEHRVHTGFDQH-EQKPTGLPRQWQSLIE                      | 44  |
|                     |             |          | .*:.*: . . . . . : . . . . . * . . . * : * : * :                        |     |
| Q9WUL6              | M3K14_MOUSE | 61       | VITK-----GT---AKDGSEGGPPAISIIAQAECEENQEFSPTFSEIRIF                      | 101 |
| O96013              | PAK4_HUMAN  | 45       | ESARRPKLVPACITSIQPGAPKTIVRGSKGAKDGALLLLDEFENM---SVTRNSLR                | 101 |
|                     |             |          | :: * : * : * : * : * : * : * : * : * : * : * : * : * : * : * : * :      |     |
| Q9WUL6              | M3K14_MOUSE | 102      | IAGSQQYSQSESLDQIPNNVAHATEGKMARVCRGK-----RHGKARKRRKRRKRSK                | 152 |
| O96013              | PAK4_HUMAN  | 102      | RDSFPPPARARQENGMPEEPATTARGGPGKAGSRGRFAGHSEAGGSGDRRRAGPEKRRPK            | 161 |
|                     |             |          | . : : . . . : * : * : * : * : * : * : * : * : * : * : * : * : * :       |     |
| Q9WUL6              | M3K14_MOUSE | 153      | SLAQAGVALAKPLRPTPEQESCTIPVQEDESPLGNLYARNVSVQFTKPLGGPGLHLCFKK            | 212 |
| O96013              | PAK4_HUMAN  | 162      | SSR-----EGSGGQESSRDKRPLSGPDVGTQPAG                                      | 192 |
|                     |             |          | * : * : * : * : * : * : * : * : * : * : * : * : * : * : * : * :         |     |
| Q9WUL6              | M3K14_MOUSE | 213      | QDEGLRFPVLRPELHKLISPLQCLNHVWKLHHPQATGPRPHPTHFPYSGMHPFPFYPL              | 272 |
| O96013              | PAK4_HUMAN  | 193      | LASGAKL-----AAGRPFNTYPR                                                 | 210 |
|                     |             |          | . * : * : * : * : * : * : * : * : * : * : * : * : * : * : * : * :       |     |
| Q9WUL6              | M3K14_MOUSE | 273      | EPWKPYMLDSAVLDKLAGVSGRPLPGPHLSQLAHGDSQKPLPGPHLESSCPSRGALEK              | 332 |
| O96013              | PAK4_HUMAN  | 211      | ADTDHPSR--GAQGEFHDVAPNGPSAGGLAIQSSSSSRP---PTRARGAPSPFVLGP               | 264 |
|                     |             |          | . . . . . : * : * : * : * : * : * : * : * : * : * : * : * : * :         |     |
| Q9WUL6              | M3K14_MOUSE | 333      | VPVEEYLVLHQLQGSVSSGQAHSLASLAKTWSSGSAKLQRLGPETEDNEGVL--TEKLK--           | 389 |
| O96013              | PAK4_HUMAN  | 265      | HASEPQLAPPAC-----T-----PAAPAVPGPPGPRSPQREPQVRSHEQFRAA                   | 307 |
|                     |             |          | * * . : * : * : * : * : * : * : * : * : * : * : * : * : * : * : * :     |     |
| Q9WUL6              | M3K14_MOUSE | 390      | -PVDYEREVEVHWMTHQPRVGRGSFGEVHRMKDKQTGFQCAVKKVRLV----FRVEEL              | 443 |
| O96013              | PAK4_HUMAN  | 308      | LQLVVDPGDPRSYLDNFIKIGEGSTGIVCIATVRSQKLVAVKMDLRKQQRRELLFNEV              | 367 |
|                     |             |          | : : : : : : : * * * * . : * : * : * : * : * : * : * : * : * :           |     |
| Q9WUL6              | M3K14_MOUSE | 444      | VACAGLSSPRIVPLYGAVREGFWNIFMELLEGGSLGQLIKMGCLPEDRALYLLGQALE              | 503 |
| O96013              | PAK4_HUMAN  | 368      | VIMRDYQHENVVEMYSYLVGDELWVMEFLEGGALTDIVTHTRMNEEQIAA-VCLAVLQ              | 426 |
|                     |             |          | * . . . . : * : * : * : * : * : * : * : * : * : * : * : * : * : * : * : |     |
| Q9WUL6              | M3K14_MOUSE | 504      | GLEYLHTRRILHGDVKADNVLLSSDGSRAALCDFGHALCLQPDGLGKLLTGDYIPGTET             | 563 |
| O96013              | PAK4_HUMAN  | 427      | ALSVLHAQGVVHRDIKSDSILLTHDGR-VKLSDFGCAQVS----KEVPRRKSIVGTPY              | 480 |
|                     |             |          | . * . * : * : * : * : * : * : * : * : * : * : * : * : * : * : * : * :   |     |
| Q9WUL6              | M3K14_MOUSE | 564      | HMAPEVVMGKPCDAKVDIWSCCMMLHMLNGCHPWTQYFRGPLCLKIAS-EPPPIREIPP             | 622 |
| O96013              | PAK4_HUMAN  | 481      | WMAPELISRLPYGPEVDIWSLIGIMVIEMVDGEPYFNEPPLKAMKMIIRDNLFPRLKLNHK           | 540 |
|                     |             |          | *****: . . . ***** * : * : * : * : * : * : * : * : * : * : * : * :      |     |
| Q9WUL6              | M3K14_MOUSE | 623      | SCAPLTAQAIQELRKEPVHRASAMELRRKVGKALQEVGGLKSPWKGEYKEPRPPQDQA              | 682 |
| O96013              | PAK4_HUMAN  | 541      | -VSFSLKGLDRLLVRDPAQRATAELK-----HPFLAKAG----PPASIV                       | 582 |
|                     |             |          | : * : * : * : * : * : * : * : * : * : * : * : * : * : * : * : * :       |     |
| Q9WUL6              | M3K14_MOUSE | 683      | TCHQTLPTPPRENPPAKANTDGAPEPQPLPPEPPEPSKAPALNLSKEESGTWEFLPLSS             | 742 |
| O96013              | PAK4_HUMAN  | 583      | PL-----MRQNRTR                                                          | 591 |
|                     |             |          | : * : * : * : * : * : * : * : * : * : * : * : * : * : * : * : * :       |     |
| Q9WUL6              | M3K14_MOUSE | 743      | LDPATAKGPSFDRRATLPELELQLELFLNLSLQPFSLQEEQILSCLSIDSLSLSD                 | 802 |
| O96013              | PAK4_HUMAN  | 592      | -----                                                                   | 591 |
| Q9WUL6              | M3K14_MOUSE | 803      | DSEKNPSKASQSSRDTLSSGVHWSNSQAEARTCSCTALARGRPTDIPSYFNGVKVQIQS             | 862 |
| O96013              | PAK4_HUMAN  | 592      | -----                                                                   | 591 |
| Q9WUL6              | M3K14_MOUSE | 863      | LNGEHLHIREFHRVKVGDIA TGISSQIPATAFSLVTKDGPVPCYDMEVPSDGI DQCTLA           | 922 |
| O96013              | PAK4_HUMAN  | 592      | -----                                                                   | 591 |
| Q9WUL6              | M3K14_MOUSE | 923      | PDGSFAWTWRVKHGQLENRP                                                    | 942 |
| O96013              | PAK4_HUMAN  | 592      | -----                                                                   | 591 |
| Identical positions |             | 129      |                                                                         |     |
| Identity            |             | 13.163%  |                                                                         |     |
| Similar positions   |             | 181      |                                                                         |     |
| Program             |             | CLUSTALO |                                                                         |     |

**Figure S2:** UniProt Align results of human PAK4 and mouse NIK protein sequence.

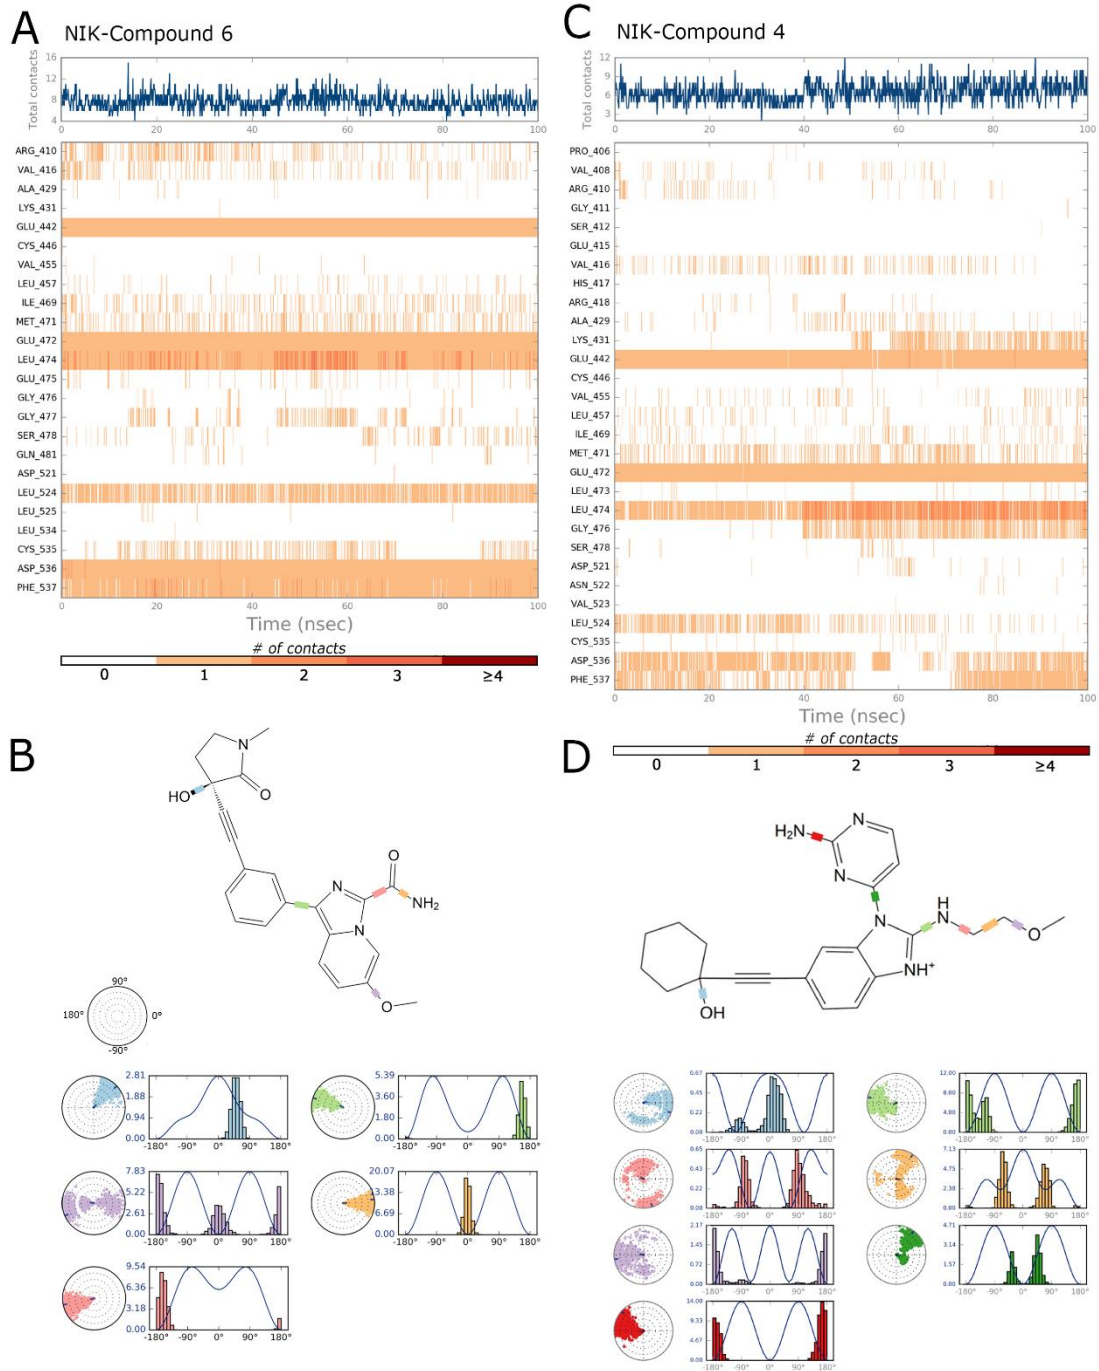

**Figure S3: (A)** Timeline of protein-ligand contacts of NIK with compound 6 **(B)** Ligand torsion profile of compound 6 in NIK. It summarized the conformational evolution of every rotatable bond in the ligand throughout the simulation trajectory **(C)** Timeline of protein-ligand contacts of NIK with compound 4 **(D)** Ligand torsion profile of compound 4 in NIK.

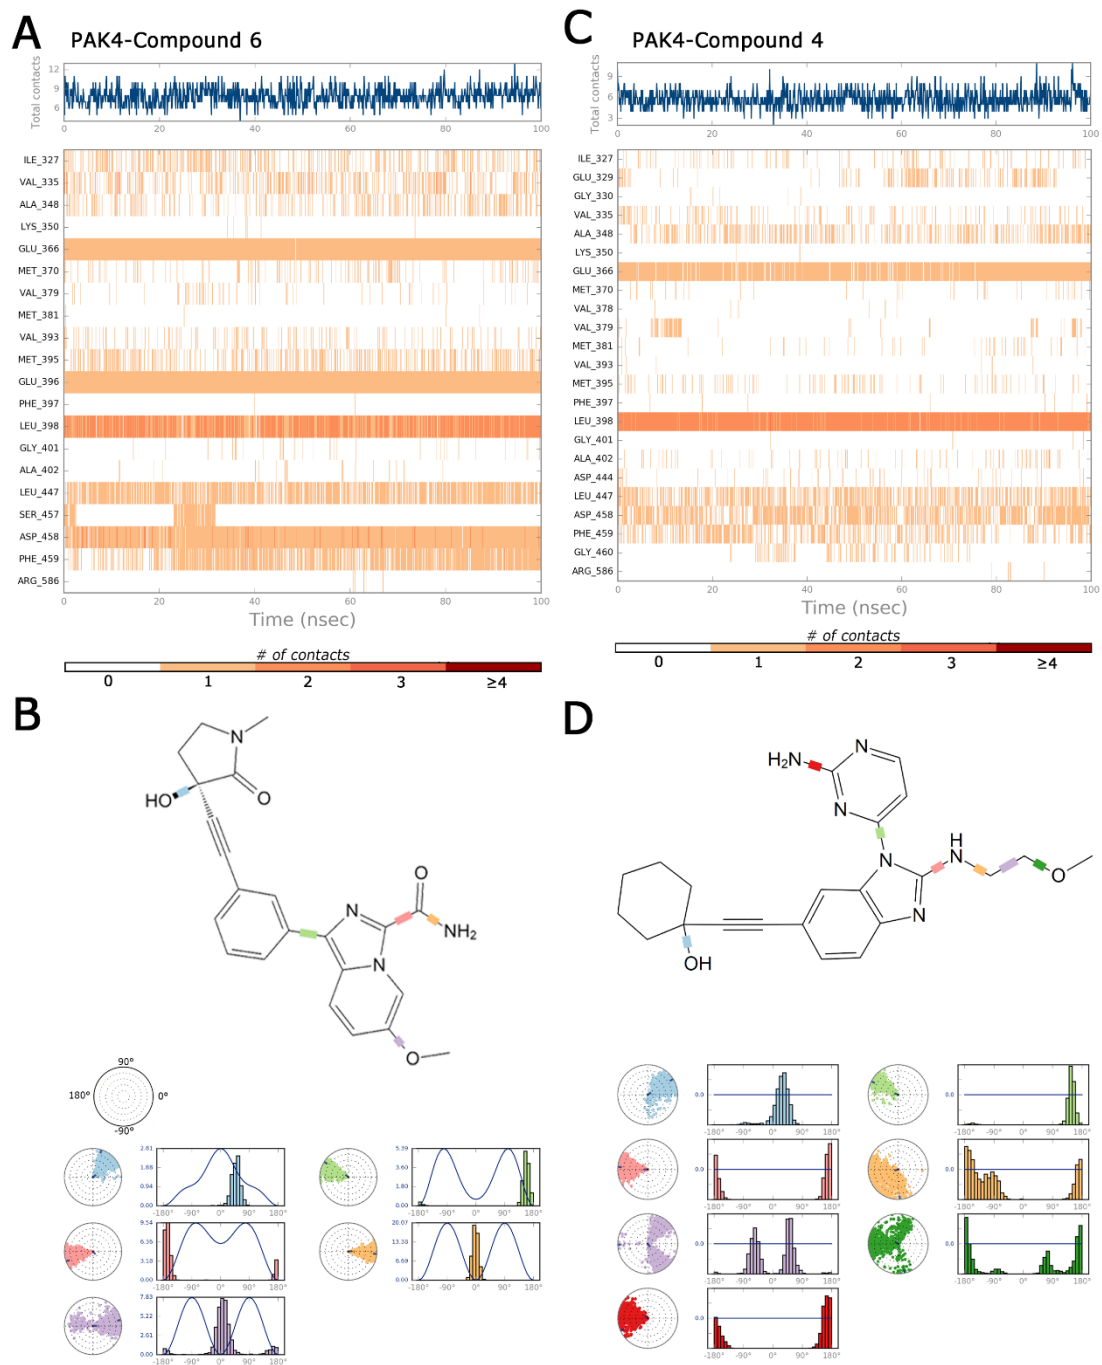

**Figure S4:** (A) Timeline of protein-ligand contacts of PAK4 with compound 6 (B) Ligand torsion profile of compound 6 in PAK4. It summarized the conformational evolution of every rotatable bond in the ligand throughout the simulation trajectory (C) Timeline of protein-ligand contacts of PAK4 with compound 4 (D) Ligand torsion profile of compound 4 in PAK4.



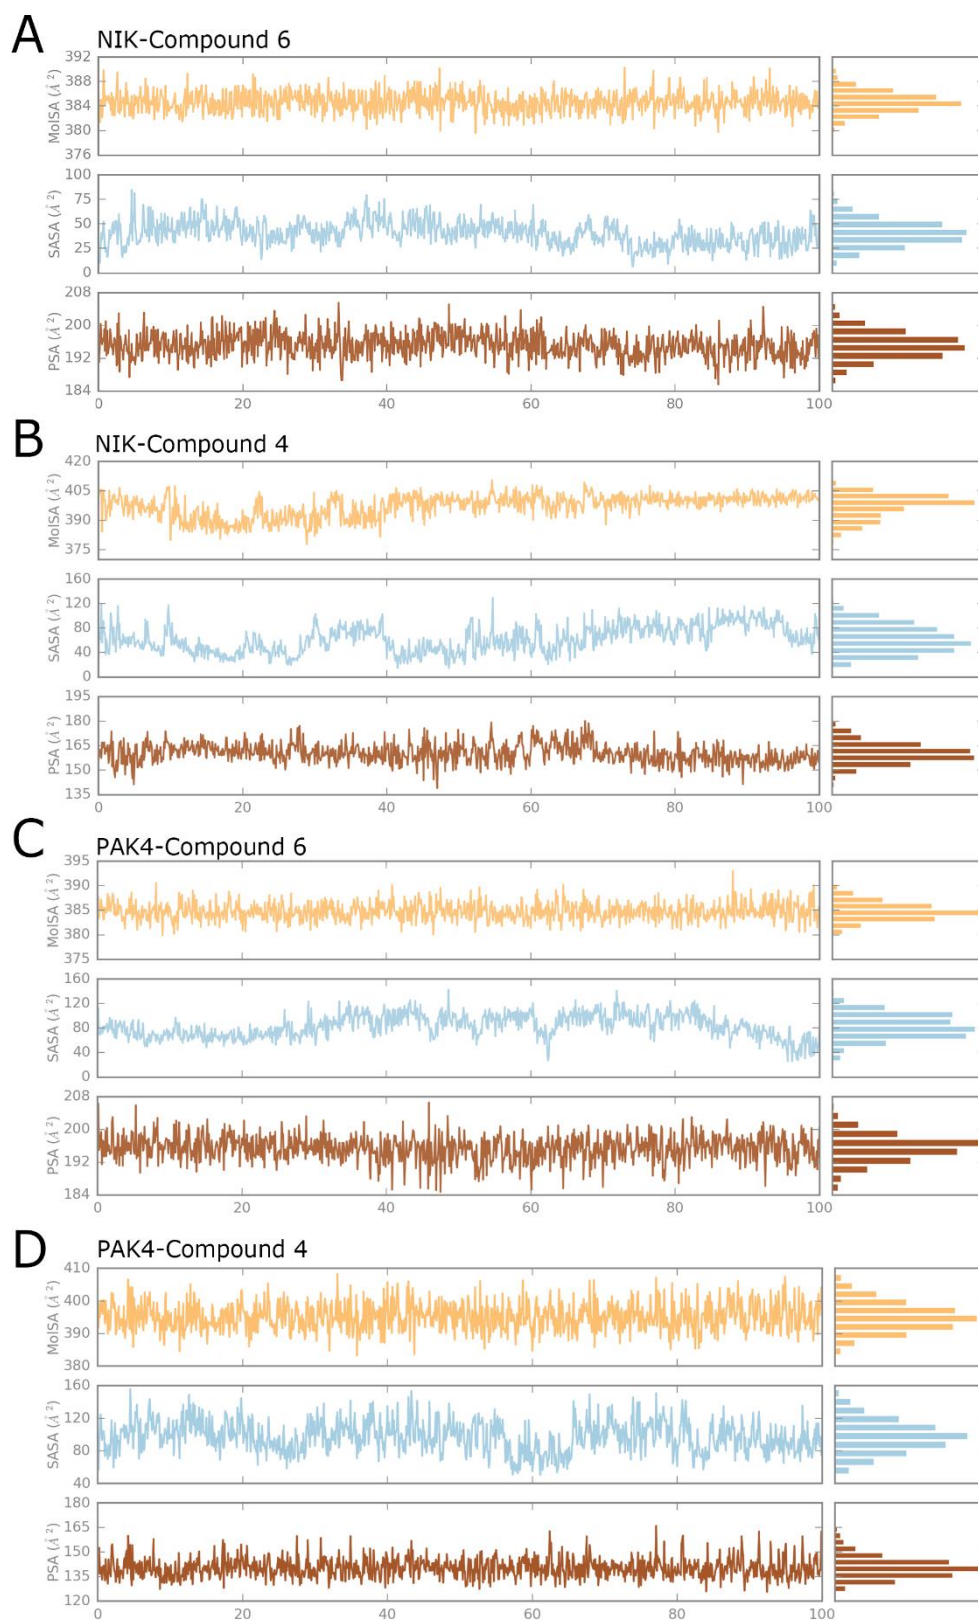

**Figure S5:** (A) (B) (C) (D) Molecular surface area, solvent accessible surface area, polar surface area ligand properties of complexes in the simulation

## NIK/compound 6

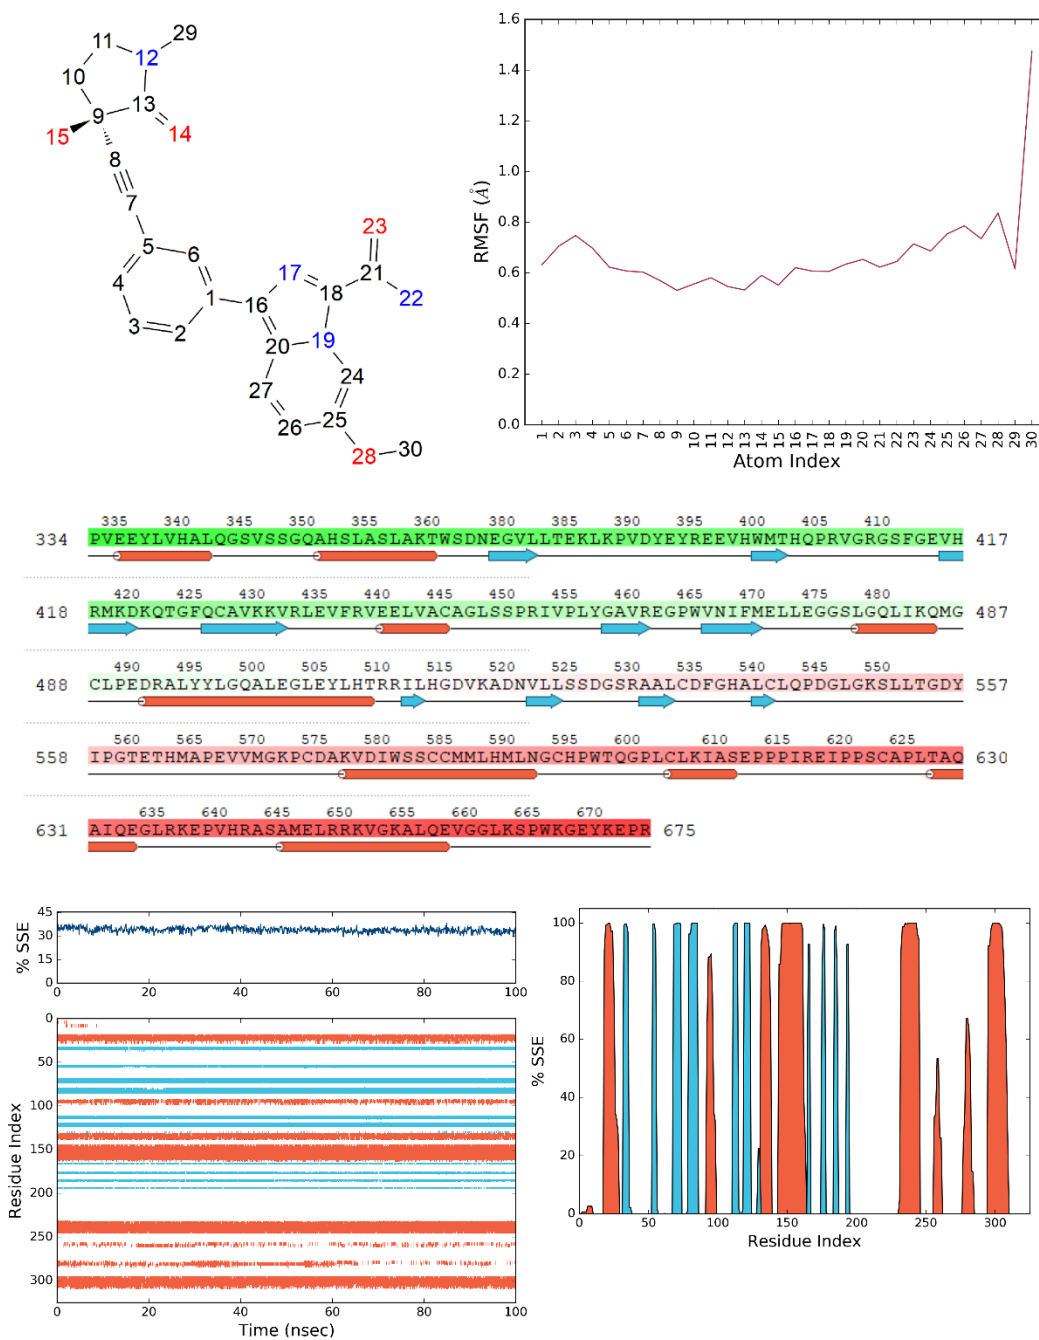

**Figure S6:** Ligand PMSF and protein secondary structure changing plots of NIK/compound 6 complex during Desmond MD simulations.

## NIK/compound 4

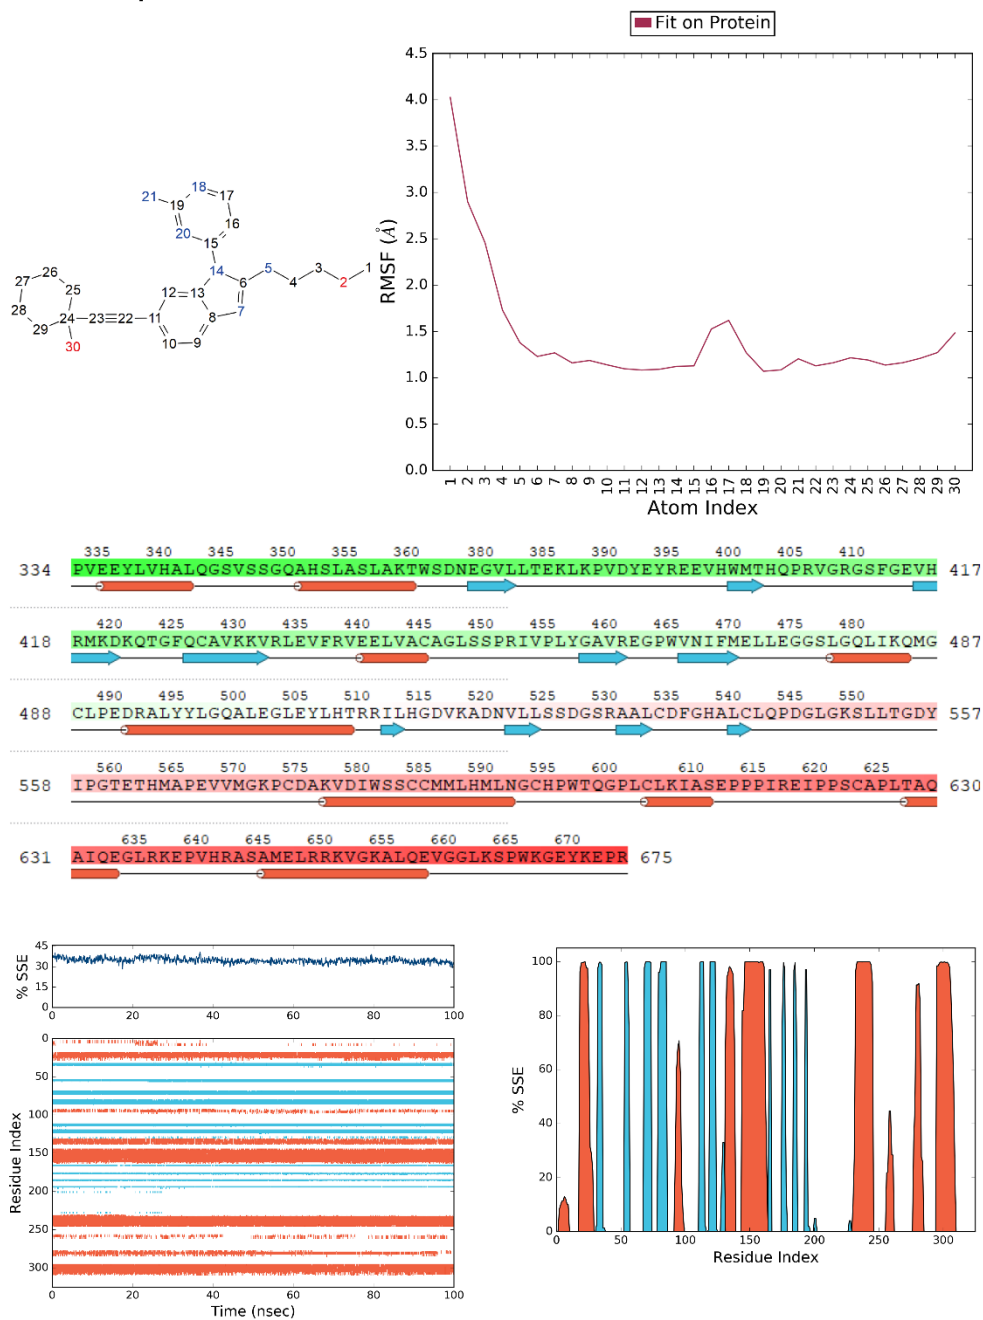

**Figure S7:** Ligand RMSF and protein secondary structure changing plots of NIK/compound 4 complex during Desmond MD simulations.

## PAK4/compound 4

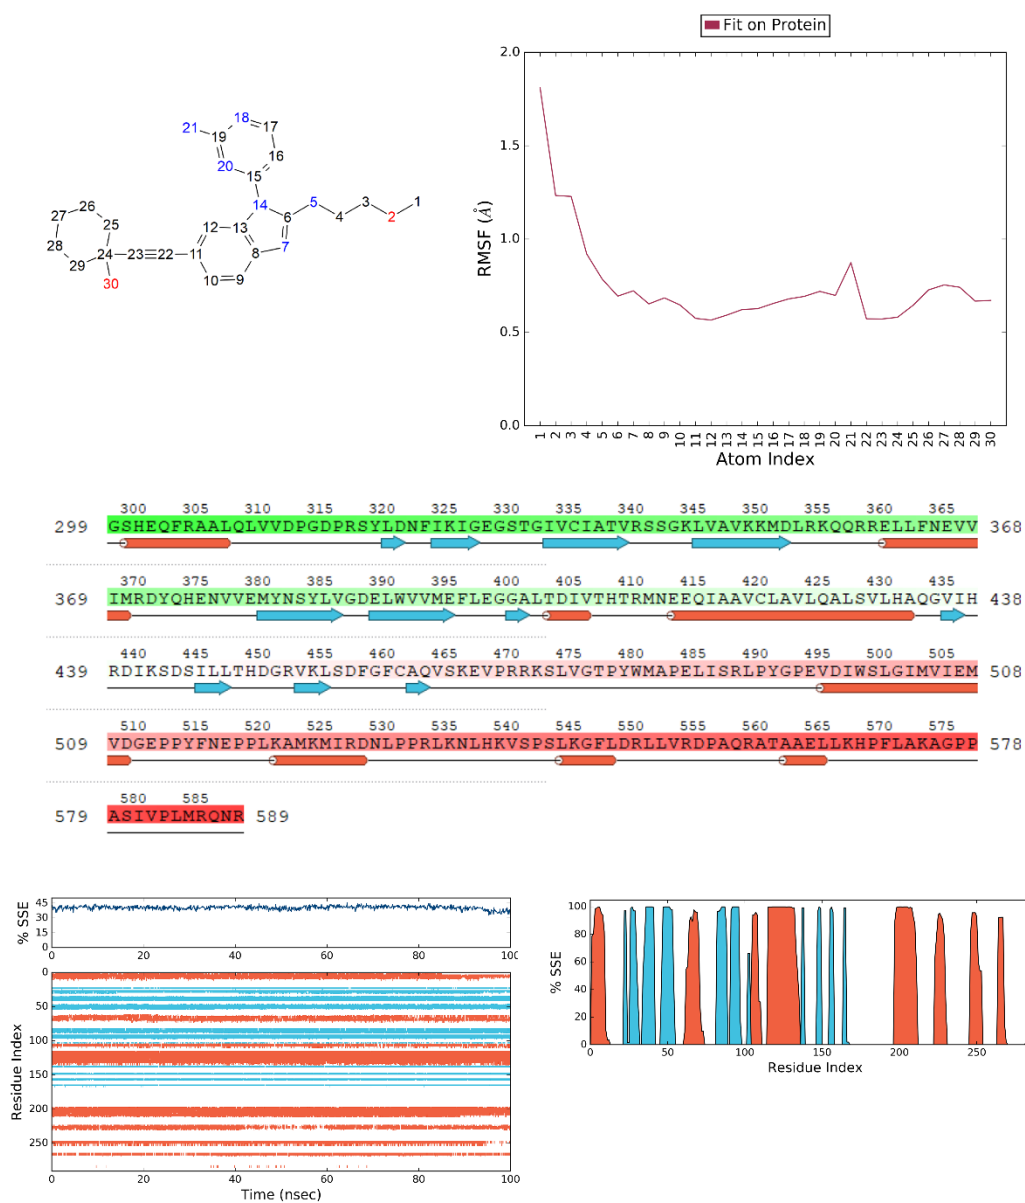

**Figure S8:** Ligand RMSF and protein secondary structure changing plots of PAK4/compound 4 complex during Desmond MD simulations.



## PAK4/compound 6

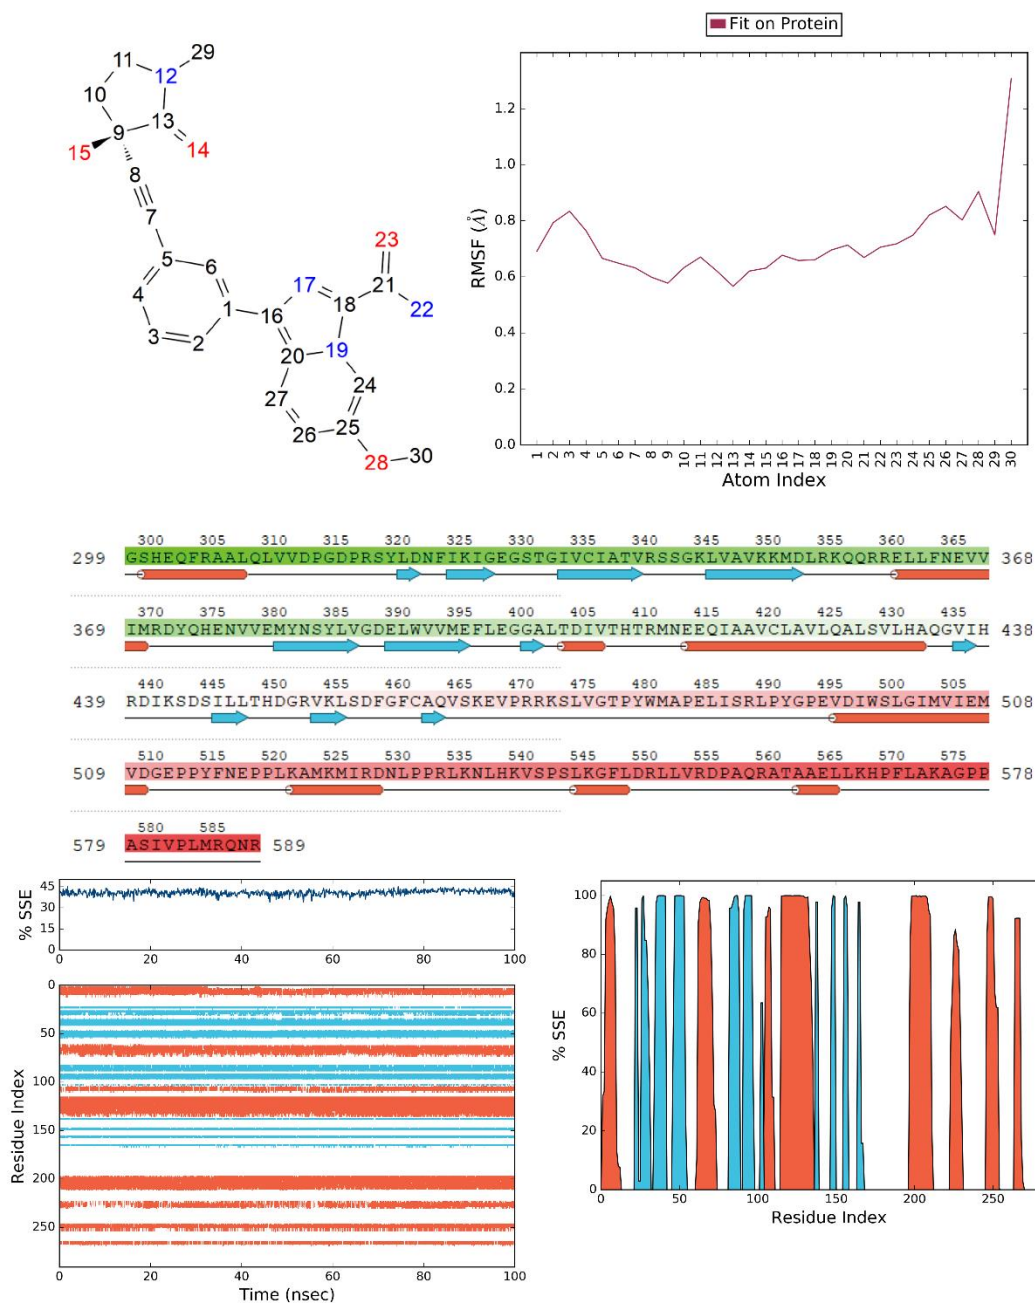

**Figure S9:** Ligand RMSF and protein secondary structure changing plots of PAK4/compound 6 complex during Desmond MD simulations.

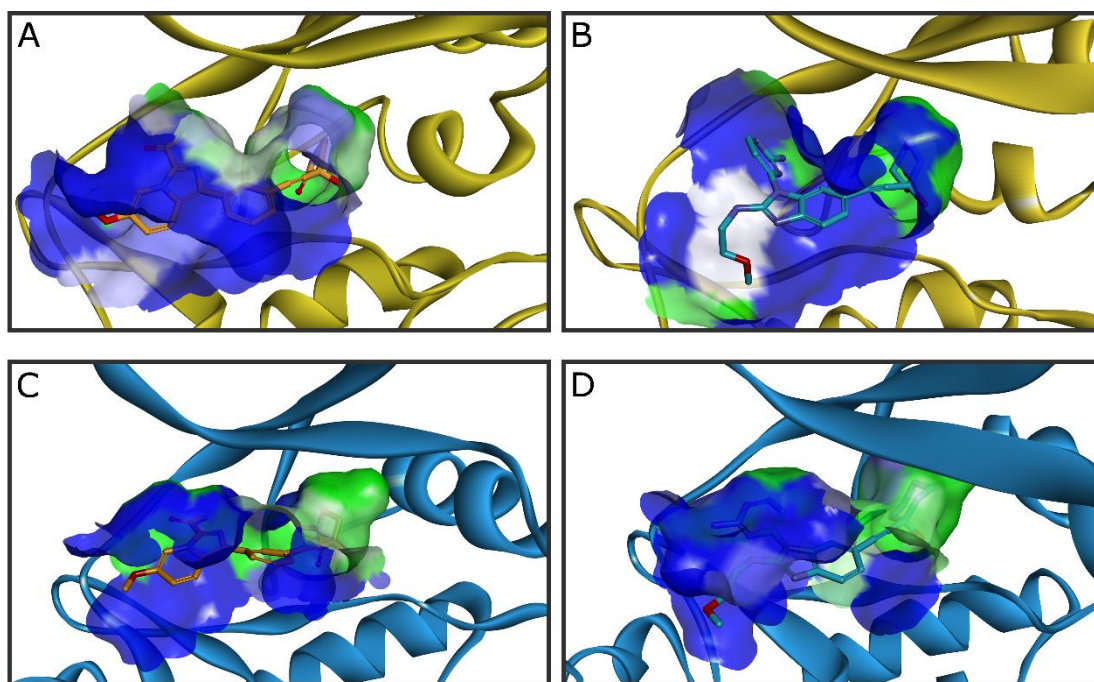

**Figure S10:** Illustration of solvent accessible surface of ligand-receptor complexes that extracted from the last frame of MD results. The surface was colored with blue and green corresponding to solvent exposing degree of receptor atoms in binding pockets. **(A)** NIK protein (yellow ribbon) complex with compound **6** (orange stick). **(B)** NIK protein complex with compound **4** (blue stick). **(C)** PAK4 protein (blue ribbon) complex with compound **4**. **(D)** PAK4 protein complex with compound

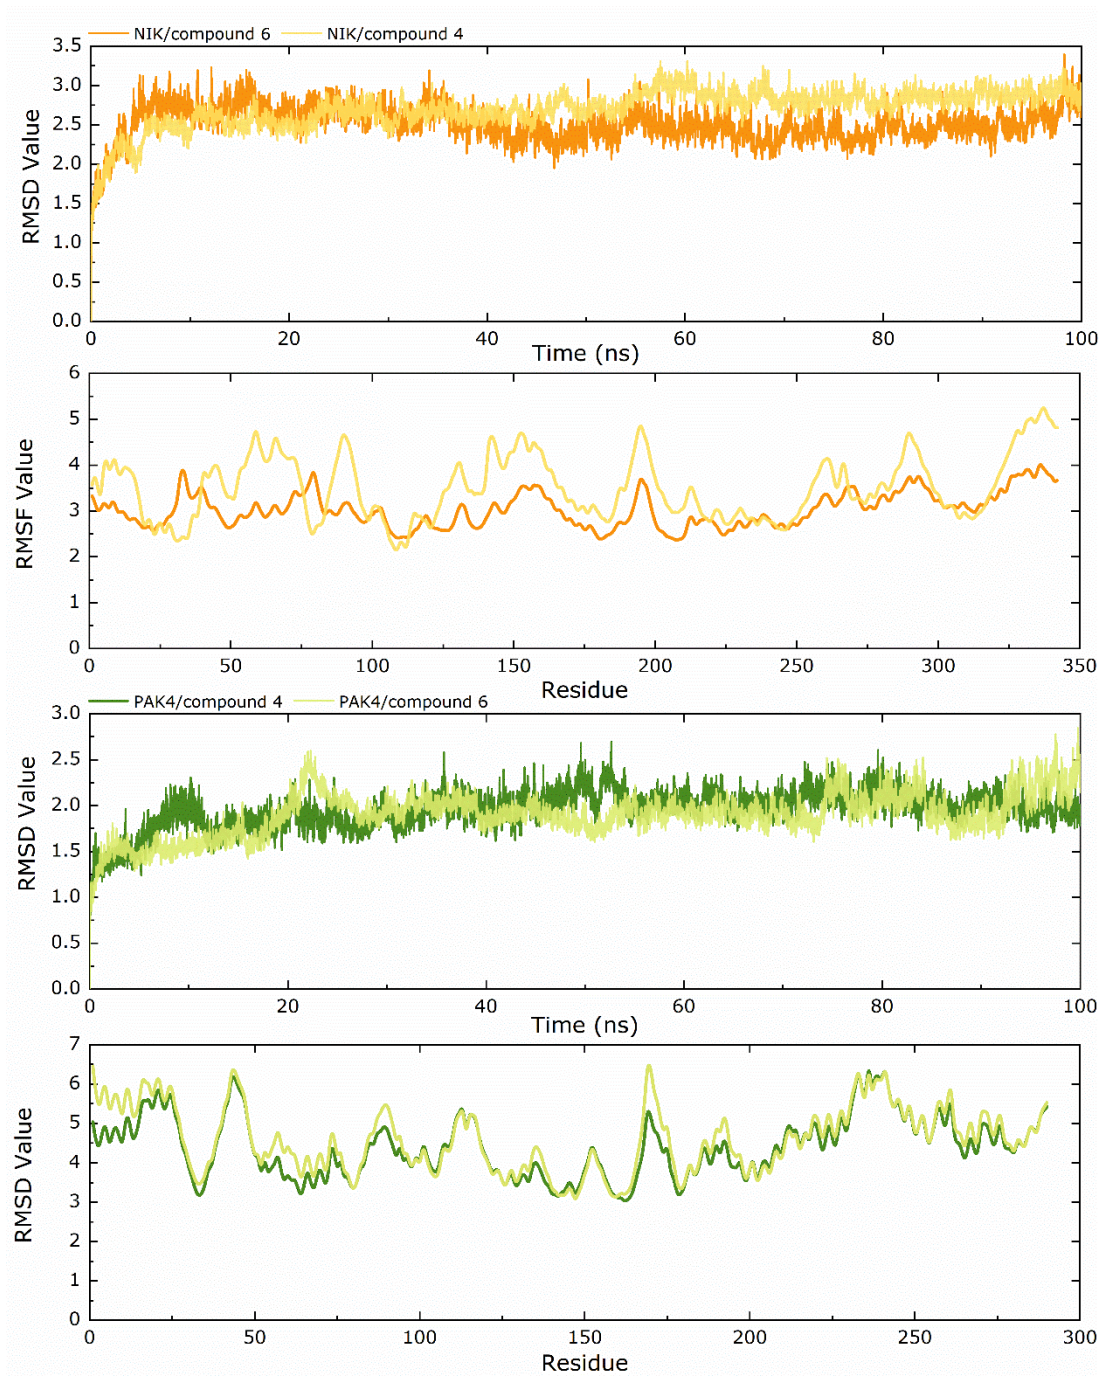

**Figure S11:** RMSD and RMSF plots of four complexes in Amber MD

**Table S1:** Distance-similarity analysis of human NIK and mouse NIK protein binding pocket

| Distance/ Å | Identity (%) | Similarity (%) | Homology (%) |
|-------------|--------------|----------------|--------------|
| 3           | 100          | 100            | 100          |
| 4           | 98.3333      | 100            | 100          |
| 5           | 98.4615      | 100            | 100          |
| 6           | 95.122       | 98.7805        | 98.7805      |
| 7           | 92.6316      | 97.8947        | 96.8421      |
| 8           | 92.3077      | 98.0769        | 97.1154      |
| 9           | 90.8333      | 96.6667        | 96.6667      |
| 10          | 91.9118      | 97.0588        | 97.0588      |

**Table S2:** Distance-similarity Analysis of human PAK4 and mouse NIK protein binding pocket

| Distance/ Å | Identity (%) | Similarity (%) | Homology (%) |
|-------------|--------------|----------------|--------------|
| 3           | 53.8462      | 71.7949        | 69.2308      |
| 4           | 46.6667      | 65             | 61.6667      |
| 5           | 43.0769      | 61.5385        | 60           |
| 6           | 39.0244      | 56.0976        | 59.7561      |
| 7           | 35.7895      | 52.6316        | 57.8947      |
| 8           | 33.6538      | 50             | 55.7692      |
| 9           | 30.8333      | 47.5           | 51.6667      |
| 10          | 30.8824      | 47.7941        | 50.7353      |



**Table S3:** Ligand single point energy results of QM/MM minimized complexes

| Entry | Complex         | HOMO (eV) | LUMO (eV) | HOMO-LUMO energy gap (eV) |
|-------|-----------------|-----------|-----------|---------------------------|
| 1     | NIK/Compound 6  | -0.1924   | -0.0477   | 0.1447                    |
| 2     | NIK/Compound 4  | -0.3269   | -0.1883   | 0.1386                    |
| 3     | PAK4/Compound 6 | -0.1896   | -0.0539   | 0.1357                    |
| 4     | PAK4/Compound 4 | -0.1898   | -0.0478   | 0.1420                    |
